# Supplementary material
Source: Research Square preprint supplement (doi:10.21203/rs.3.rs-9697035/v1)
Supplement: Supplementary file 1 [file 4b9de27c894bd9fb051c3192.docx]

**Supplementary Information**

Additional file 1: Table S1. Gene ID and gene symbol correspondence.

Additional file 2: Table S2. Sample information and sequencing quality-control statistics.

Additional file 3: Table S3. Marker genes for annotated cell clusters in CG and VG.

Additional file 4: Table S4. Differential expression and KEGG enrichment analyses between CG and VG neurons.

Additional file 5: Table S5. Neuronal subtype composition of integrated clusters.

Additional file 6: Table S6. vKO and GENIE3 analyses of the *Gata3–Pitx–Uncx* regulatory module in VG neurons.

Additional file 7: Table S7. KEGG enrichment analysis of MGCs- and NPC2-specific DEGs.

Additional file 8: Table S8. SAMap cross-species cell-type alignment results.
